# Supplementary material for: Cytochrome P450 endoplasmic reticulum-associated degradation (ERAD): therapeutic and pathophysiological implications
Source: PubMed Central journal article supplement — Acta Pharm Sin B. 2019 Nov 8;10(1):42–60. doi: 10.1016/j.apsb.2019.11.002 (PMC6976991; doi:10.1016/j.apsb.2019.11.002), 2019-11-08
Supplement: mmc3.pdf [file mmc3.pdf]

**Supporting Information for**

**Original article**

## **Cytochrome P450 endoplasmic reticulum-associated degradation (ERAD): Therapeutic and pathophysiological implications.**

**Doyoung Kwon<sup>a</sup>, Sung-Mi Kim<sup>a</sup>, Maria Almira Correia<sup>a,b,c,d,\*</sup>**

<sup>a</sup>*Departments of Cellular & Molecular Pharmacology, University of California San Francisco, San Francisco, CA 94158-2517, USA*

<sup>b</sup>*Pharmaceutical Chemistry, University of California San Francisco, San Francisco, CA 94158-2517, USA*

<sup>c</sup>*Bioengineering and Therapeutic Sciences, University of California San Francisco, San Francisco, CA 94158-2517, USA*

<sup>d</sup>*The Liver Center, University of California San Francisco, San Francisco, CA 94158-2517, USA*

Received 9 July 2019; received in revised form 30 October 2019; accepted 31 October 2019

\*Corresponding author. Fax: +1 415 476 5292.

E-mail address: [almira.correia@ucsf.edu](mailto:almira.correia@ucsf.edu) (Maria Almira Correia).

### **Materials & Methods**

#### *1.1. Animals and treatments*

*Chip*-knockout mice were generated and maintained on a mixed genetic background of C57BL/6 and 129SvEv according to previous studies (Kim et al.<sup>140</sup>, 2016; Dai et al.<sup>245</sup>, 2003). Liver-specific *Gp78*-knockout mice (C57BL/6-background) were generated as previously described (Kwon et al.<sup>246</sup>, 2019). Mice were fed a standard chow diet, provided with water *ad libitum*, and maintained under 12-h light/dark cycle. All animal experimental protocols were approved by the UCSF/Institutional Animal Care and Use Committee (CA, USA).

#### *1.2. Primary culture of mouse hepatocytes*

Hepatocytes were isolated from male mice (8-week old) by *in situ* liver perfusion with collagenase and purification by Percoll gradient centrifugation at the UCSF Liver Center Cell Biology Core as described previously (Han et al.<sup>247</sup>, 2005). The freshly isolated hepatocytes were seeded on 60 mm Permax plates (Thermo Fisher Scientific, Waltham, MA, USA) coated with type I collagen, and incubated at 37 °C for 6 h in William's E medium containing 2 mmol/L L-glutamine, penicillin–streptomycin, insulin–transferrin–selenium, 0.1% bovine serum albumin Fraction V, and 0.1 µmol/L dexamethasone (DEX). The cells were overlaid with Matrigel (Matrigel<sup>®</sup> Matrix, Corning Inc. New York, NY, USA), and were stabilized for 2 days. For CYP2E1 or 3a induction, isoniazid (INH, 1 mmol/L) or DEX (10 µmol/L), respectively, was added to the cells on the 3rd day, and cells were treated with fresh medium containing the P450 inducer daily for another 2 days. To monitor the relative fructose-elicited fat accumulation of WT and *gp78* KO hepatocytes, fructose 10 or 20 mmol/L was concurrently added to the cultures for the last 3 days. To examine the role of CYP2E1 in fructose-induced fatty

liver, hepatocytes were first pre-treated with INH (1 mmol/L) for 12 h, and incubated with both INH (1 mmol/L) and fructose (20 mmol/L) for 3 days. On the 3<sup>rd</sup> day, cells were then treated with the CYP2E1 inhibitor, 4-methylpyrazole (4-MP; X mmol/L), for the last 2 h before harvesting.

### *1.3. Oil red O staining*

Cultured hepatocytes were fixed with 10 % neutral buffered-formalin for 1 h. Cells were incubated with oil red O (180 mg/mL, Cat. No. O0625, Sigma-Aldrich Corp., St. Louis, MO, USA) dissolved in 60% (v/v) isopropanol for 5 min followed by the incubation of hematoxylin solution (Cat. No. HHS16, Sigma-Aldrich Corp.) for 1 min. Cells were washed with warm water, and the red lipid and blue nuclei were observed through a microscope (Microphot-FXA, Nikon Instruments Inc., Tokyo, Japan) equipped with a camera (SPOT Imaging Model 1.3.0., Diagnostic Instruments, Inc., Sterling Heights, MA, USA).

### *1.4. Western immunoblotting analyses*

Cells were harvested and lysed by ultrasonic homogenizer (Omni-Ruptor 250, Omni International Inc., Kennesaw, GA, USA) in cell lysis buffer (Cat. No. 9803, Cell Signaling Technology, Inc. Danvers, MA). The centrifuged (14,000 × g, 4 °C, 10 min) whole cell lysates (proteins 5–15 µg) were used for the immunoblotting (IB) analyses as previously described (Kim et al.<sup>140</sup>, 2016). Primary antibodies against CYP2E1 and CYP3A were purified from rabbit and goat sera, respectively. Commercial primary antibodies used in this study were listed in Table S3.

### *1.5. Cytotoxicity test*

Cytotoxicity was measured by quantifying the medium adenylate kinase released from the damaged cells using the ToxiLight™ bioassay kit (Lonza Ltd., Basel, Switzerland).

### *1.6. Hepatic triglyceride determination*

Intracellular triglyceride (TG) level of cultured primary hepatocytes was determined by Triglyceride Colorimetric Assay Kit (Cat. No. 10010303, Cayman Chemical, Ann Arbor, MI, USA).

### *1.7. Free fatty acid determination*

Free fatty acids in cell homogenates were monitored by Free Fatty Acid Quantitation Kit (Cat. No. MAK044, Sigma-Aldrich Corp.)

### *1.8. Determination of oxidative stress*

Malondialdehyde (MDA), a product of lipid peroxidation, was quantified using the cell homogenates by a thiobarbituric acid reactive substances (TBARS) assay kit (Cat. No. 10009055, Cayman Chemical, Ann Arbor, MI, USA).

### *1.9. SILAC-like (SILL) proteomic analyses*

<sup>13</sup>C-Lysine specific labeled liver tissue (<sup>13</sup>C atom > 97 %; Cat. No. 252923900) from 8-week-old male C57BL/6 mouse was purchased from Silantes (Munich, Germany). The liver tissue was homogenized in cell lysis buffer (Cell Signaling Technology), and the centrifuged (14,000 × g, 4 °C, 10 min) supernatant (lysate) was mixed with an equal protein amount of liver lysate from WT or *Gp78*-KO mouse of the same age. The mixed lysates (10 µg proteins) were subjected to SDS-PAGE for in-gel digestion. Gels were stained with Coomassie blue, and each gel lane was sliced into 10 sections. The gel pieces were reduced and alkylated, and then the proteins were digested by trypsin (1 µg; Promega Corp., Madison, WI, USA) and lysyl endoproteinase C (Lys-C, 1 µg; Wako Pure Chemical Industries, Ltd., Osaka, Japan) overnight at 37 °C. The digested peptide mixtures were desalted by C<sub>18</sub>-Ziptips (Sigma–Aldrich Corp.), and resuspended in 0.1% formic acid. For LC–MS/MS analyses, peptides were injected into a nanoAcquity UPLC system (Waters, Milford, MA, USA) and separated by EASY-Spray column (75 µm × 15 cm column packed with 3 µm, 100 Å PepMap C18 resin; Thermo Fisher Scientific) following a 60-min solvent gradient program using 0.1% formic acid and 0.1% formic acid in acetonitrile as mobile phases A and B, respectively, at a flow rate of 300 nL/min. The separated peptides were analyzed by an LTQ-Orbitrap Velos mass spectrometer (Thermo Fisher Scientific) under high-energy collisional dissociation (HCD) mode. Peak lists from the 10 gel fractions were extracted by PAVA, an in-house software of UCSF mass spectrometry facility, and pooled to search against the Swissprot mouse database (SwissProt.2015.12.1) using ProteinProspector version 5.19.1 (<http://prospector.ucsf.edu/prospector/mshome.htm>). Following parameters for ProteinProspector search were used. Tolerance for parent and fragment ions were 20 ppm and 25 ppm. Carbamidomethylation of cysteine and <sup>13</sup>C-lysine were set as a fixed modification and a variable modification, respectively. The peptide numbers that are uniquely recognized as mouse proteins were obtained from the program to compare the relative protein amounts of WT and *gp78* livers.

See Tables 1 and 2 in separated supporting information file.

**Table S3.** Specific antibodies used in IB-analyses.

| Antibody                                   | Clonality          | Catalog number | Manufacturer                   |
|--------------------------------------------|--------------------|----------------|--------------------------------|
| ACC                                        | Rabbit monoclonal  | 3676s          | Cell Signaling Technology      |
| ACC (pS79)                                 | Rabbit polyclonal  | 3661s          | Cell Signaling Technology      |
| Akt                                        | Mouse monoclonal   | MAB2055        | R&D Systems, Inc.              |
| Akt (pS473)                                | Rabbit polyclonal  | 9271s          | Cell Signaling Technology      |
| Akt (pT308)                                | Mouse monoclonal   | MAB7419        | R&D Systems, Inc.              |
| AMPK $\alpha$                              | Rabbit monoclonal  | 5831s          | Cell Signaling Technology      |
| AMPK $\alpha$ (pT172)                      | Rabbit monoclonal  | 2535s          | Cell Signaling Technology      |
| FAS                                        | Rabbit monoclonal  | 3180s          | Cell Signaling Technology      |
| FOXO1                                      | Rabbit monoclonal, | 2880s          | Cell Signaling Technology      |
| FOXO1 (pT24)/FOXO3a<br>(pT32)/FOXO4 (pT28) | Rabbit monoclonal  | 2599s          | Cell Signaling Technology      |
| FOXO3a                                     | Rabbit monoclonal  | 12829s         | Cell Signaling Technology      |
| GAPDH                                      | Rabbit monoclonal  | 2118s          | Cell Signaling Technology      |
| Histon H3                                  | Rabbit polyclonal  | ab1791         | Abcam, plc.                    |
| Insig-1                                    | Rabbit polyclonal  | 3854-30T       | BioVision, Inc.                |
| Insig-2                                    | Rabbit polyclonal  | ab86415        | Abcam, plc.                    |
| LKB1                                       | Rabbit monoclonal  | 3047s          | Cell Signaling Technology      |
| LKB1 (pS428)                               | Rabbit monoclonal  | 3482s          | Cell Signaling Technology      |
| PGC-1 $\alpha$                             | Rabbit polyclonal  | ab54481        | Abcam, plc.                    |
| SCD-1                                      | Rabbit monoclonal  | MA5-14885      | Thermo Fisher Scientific, Inc. |
| SREBP-1                                    | Mouse monoclonal   | sc-365513      | Santa Cruz Biotechnology, Inc. |

## References

140. Kim SM, Grenert JP, Patterson C, Correia MA. CHIP<sup>-/-</sup>-Mouse liver: adiponectin-AMPK-FOXO-activation overrides CYP2E1-elicited JNK1-activation, delaying onset of NASH: therapeutic implications. *Sci Rep* 2016; **6**:29423.
245. Dai Q, Zhang C, Wu Y, McDonough H, Whaley RA, Godfrey V et al. CHIP activates HSF1 and confers protection against apoptosis and cellular stress. *EMBO J* 2003; **22**:5446-58.
246. Kwon D, Kim S, Jacob P 3rd, Liu Y, Correia MA. Induction *via* functional protein stabilization of hepatic cytochromes P450 upon gp78/autocrine motility factor receptor (AMFR) ubiquitin E3-ligase genetic ablation in mice: therapeutic and toxicological relevance. *Mol Pharmacol* 2019. (epublished 9/6/19); doi: 10.1124/mol.119.117069.
247. Han XM, Lee G, Hefner C, Maher JJ, Correia MA. Heme-reversible impairment of CYP2B1/2 induction in

heme-depleted rat hepatocytes in primary culture: translational control by a hepatic alpha-subunit of the eukaryotic initiation factor kinase?. *J Pharmacol Exp Ther* 2005; **314**:128-38.
